# Supplementary material for: Stent revascularization versus bypass surgery for peripheral artery disease in type 2 diabetic patients – an instrumental variable analysis
Source: PubMed Central journal article supplement (PMC5114545; doi:10.1038/srep37177), 2016-11-18

**Stent revascularization versus bypass surgery for peripheral artery disease in  
type 2 diabetic patients – an instrumental variable analysis**

**Authors:** Chia-Hsuin Chang; Jou-Wei Lin; Jiun Hsu; Li-Chiu Wu; Mei-Shu Lai

Number of Supplementary Tables: 5

Number of Supplementary Figures: 1

**Supplementary Table 1.** ICD-9-CM diagnostic codes used to identify patients with diabetes mellitus and co-morbid diseases

| Comorbidities                   | ICD-9-CM codes                                                                                                  |
|---------------------------------|-----------------------------------------------------------------------------------------------------------------|
| Diabetes mellitus               | 250                                                                                                             |
| Type 1 diabetes mellitus        | 250.x1, 250.x3                                                                                                  |
| Cardiovascular disease          | 401-405, 410-414, 425-428, 429.1-429.3, 441, 442                                                                |
| Ischemic heart disease          | 410-414                                                                                                         |
| Myocardial infarction           | 410, 412                                                                                                        |
| Cerebrovascular disease         | 430-438                                                                                                         |
| Ischemic stroke                 | 433, 434, 436 (exclude 800, 801, 802, 803, 804, 850, 851, 852, 853, 854 ,V57)                                   |
| Ketoacidosis or hyperosmolarity | 250.1, 250,2                                                                                                    |
| Retinopathy                     | 250.5, 362.0x, 362.53, 362.83, 364.42, 379.23, 369                                                              |
| Neuropathy                      | 250.6, 337.1, 354, 355, 356.8, 357.2, 358.1, 713.5, 729.2                                                       |
| Nephropathy                     | 250.4, 580-588, 590, 593, 595, 596, 599, 791.0                                                                  |
| Chronic kidney disease          | 403.01, 403.11, 403.91, 404.02, 404.03, 404.12, 404.13, 404.92, 404.93, 585, V45.1, V56.0, V56.8                |
| Chronic liver disease           | 070.2x, 070.3x, V02.61, 070.41, 070.44, 070.51, 070.54, V02.62, 571.0, 571.1, 571.2, 571.3, 571.4, 571.5, 571.6 |
| Chronic lung disease            | 490-496, 500-508                                                                                                |
| Depression                      | 296.2, 296.3, 298.0, 300.4, 309.0, 309.1, 293.83, 296.82, 296.90, 309.28, 311, V79.0                            |

**Supplementary Table 2.** Percutaneous stents approved for treating ilio-femoral artery stenosis in Taiwan between 1 January 2000 and 31 December 2007

|                                                                                    |
|------------------------------------------------------------------------------------|
| Boston Scientific Wallstent Iliac Endoprosthesis with Unistep Plus Delivery System |
| Angiomed Luminexx Vascular Stent                                                   |
| Cook Zilver Vascular Stent (Iliac artery)                                          |
| Angiomed Bard E. Luminexx Vascular Stent                                           |

**Supplementary Table 3.** Medication and the Anatomical Therapeutic Chemical (ATC) classification system

| Medication                               | ATC code                  |
|------------------------------------------|---------------------------|
| Biguanides                               | A10BA                     |
| Sulfonylurea                             | A10BB                     |
| Alpha-glucosidase inhibitors             | A10BF                     |
| Thiazolidinediones                       | A10BG                     |
| Glinides                                 | A10BX02, A10BX03          |
| Fast-acting insulins                     | A10AB                     |
| Basal insulins                           | A10AE01, A10AE04, A10AE05 |
| Aspirin                                  | B01AC06, N02BA01          |
| Clopidogrel                              | B01AC04                   |
| Cilostazol                               | B01AC23                   |
| Wafarin                                  | B01AA03                   |
| Angiotensin converting enzyme inhibitors | C09AA                     |
| Angiotensin receptor blockers            | C09CA                     |
| Alpha-blockers                           | C02CA                     |
| Beta-blockers                            | C07A                      |
| Calcium channel blockers                 | C08C, C08D, C08E          |
| Diuretics                                | C03                       |
| Other anti-hypertensive agents           | C02A, C02B, C02CC, C02D   |
| Fibrates                                 | C10AB                     |
| Statins                                  | C10AA                     |

**Supplementary Table 4.** Baseline characteristics of diabetic patients with ilio-femoral artery stenosis during the 12-month period in the propensity score-matched cohort preceding peripheral artery bypass surgery or stenting

|                                                           | Propensity score-matched cohort |                               |                                 |
|-----------------------------------------------------------|---------------------------------|-------------------------------|---------------------------------|
|                                                           | Stenting<br>(N = 433)           | Bypass surgery<br>(N = 1,196) | Standardized<br>mean difference |
| Age (mean ± SD)                                           | 70.41±9.16                      | 69.49±10.13                   | -0.10                           |
| Male (%)                                                  | 60.51                           | 53.34                         | -0.15                           |
| <i>Comorbidities</i>                                      |                                 |                               |                                 |
| Cardiovascular disease                                    | 34.87                           | 36.29                         | 0.03                            |
| Ischemic heart disease                                    | 19.40                           | 17.06                         | -0.06                           |
| Cerebrovascular disease                                   | 9.01                            | 8.36                          | -0.02                           |
| Ketoacidosis or hyperosmolarity                           | 0.46                            | 0.50                          | 0.01                            |
| Retinopathy                                               | 2.77                            | 2.76                          | 0.00                            |
| Neuropathy                                                | 2.08                            | 1.51                          | -0.04                           |
| Nephropathy                                               | 17.78                           | 24.50                         | 0.17                            |
| Myocardial infarction                                     | 3.23                            | 3.51                          | 0.02                            |
| Ischemic stroke                                           | 31.41                           | 25.33                         | -0.14                           |
| Chronic renal failure                                     | 14.09                           | 20.57                         | 0.17                            |
| Chronic liver disease                                     | 1.85                            | 1.51                          | -0.03                           |
| Chronic lung disease                                      | 1.62                            | 1.92                          | 0.02                            |
| Depression                                                | 0.23                            | 0.17                          | -0.01                           |
| Charlson's index<br>(mean ± SD)                           | 0.96±1.50                       | 1.13±1.62                     | 0.11                            |
| Number of different ICD-9<br>diagnoses<br>(mean ± SD)     | 2.47±2.88                       | 2.83±3.15                     | 0.12                            |
| Number of cardiovascular-related<br>diagnoses (mean ± SD) | 0.74±1.29                       | 0.74±1.22                     | 0.00                            |
| <i>Medication use (%)</i>                                 |                                 |                               |                                 |
| Biguanides                                                | 55.20                           | 50.08                         | -0.10                           |
| Sulfonylurea                                              | 67.90                           | 63.38                         | -0.10                           |
| Alpha-glucosidase inhibitors                              | 19.86                           | 19.23                         | -0.02                           |
| Thiazolidinedione                                         | 21.71                           | 19.23                         | -0.06                           |
| Glinides                                                  | 19.86                           | 22.32                         | 0.06                            |
| Any oral anti-diabetic agents                             | 80.37                           | 77.09                         | -0.08                           |
| Fast-acting insulin                                       | 36.49                           | 42.22                         | 0.12                            |
| Basal insulin                                             | 12.93                           | 14.13                         | 0.04                            |
| Aspirin                                                   | 72.75                           | 67.14                         | -0.12                           |
| Clopidogrel                                               | 32.56                           | 28.01                         | -0.10                           |
| Cilostazol                                                | 26.79                           | 28.34                         | 0.03                            |

|                                                                 |                   |                   |       |
|-----------------------------------------------------------------|-------------------|-------------------|-------|
| Warfarin                                                        | 6.24              | 5.77              | -0.02 |
| ACE inhibitors                                                  | 43.19             | 41.89             | -0.03 |
| Angiotensin receptor blockers                                   | 47.58             | 46.07             | -0.03 |
| Alpha-blockers                                                  | 18.71             | 19.06             | 0.01  |
| Beta-blockers                                                   | 58.43             | 57.02             | -0.03 |
| Calcium channel blockers                                        | 75.06             | 76.67             | 0.04  |
| Diuretics                                                       | 55.66             | 57.53             | 0.04  |
| Other anti-hypertensive agents                                  | 9.01              | 10.95             | 0.06  |
| Statins                                                         | 46.19             | 42.89             | -0.07 |
| Fibrates                                                        | 13.63             | 15.72             | 0.06  |
| Number of different prescription drugs<br>(mean $\pm$ SD)       | 45.96 $\pm$ 24.38 | 48.37 $\pm$ 25.10 | 0.10  |
| Number of cardiovascular-related medications<br>(mean $\pm$ SD) | 7.81 $\pm$ 5.04   | 7.86 $\pm$ 5.26   | 0.01  |
| <i>Resource utilization (mean <math>\pm</math> SD)</i>          |                   |                   |       |
| Number of A <sub>1</sub> C measurement                          | 1.93 $\pm$ 1.91   | 1.91 $\pm$ 1.81   | -0.01 |
| Number of lipid-related lab test                                | 5.24 $\pm$ 5.26   | 5.43 $\pm$ 5.22   | 0.04  |
| Number of peripheral artery ultrasound examination              | 0.04 $\pm$ 0.22   | 0.05 $\pm$ 0.27   | 0.04  |
| Number of outpatient visits due to diabetes                     | 17.37 $\pm$ 11.61 | 17.15 $\pm$ 11.52 | -0.02 |
| Number of outpatient visits not due to diabetes                 | 47.99 $\pm$ 26.85 | 48.69 $\pm$ 26.77 | 0.03  |
| Number of emergency department visit                            | 1.45 $\pm$ 2.56   | 1.68 $\pm$ 2.40   | 0.09  |
| Number of cardiology outpatient visits                          | 5.71 $\pm$ 9.12   | 6.11 $\pm$ 8.94   | 0.04  |
| Number of cardiovascular surgery outpatient visits              | 3.04 $\pm$ 5.88   | 3.24 $\pm$ 6.66   | 0.03  |
| Number of cardiovascular-related physician visits               | 17.21 $\pm$ 11.07 | 16.10 $\pm$ 12.72 | -0.09 |
| Coronary revascularization %                                    | 8.78              | 7.78              | -0.04 |
| Prior amputation %                                              | 5.54              | 7.94              | 0.10  |
| Amputation at index hospitalization %                           | 3.70              | 7.94              | 0.18  |
| Number of hospitalization due to diabetes                       | 1.06 $\pm$ 1.49   | 1.26 $\pm$ 1.58   | 0.13  |
| Number of hospitalization due to lower extremity complications  | 0.18 $\pm$ 0.49   | 0.23 $\pm$ 0.54   | 0.10  |
| Number of hospitalization not due to diabetes                   | 1.34 $\pm$ 1.72   | 1.58 $\pm$ 1.85   | 0.13  |
| Number of hospital days                                         | 13.27 $\pm$ 28.21 | 16.10 $\pm$ 26.34 | 0.10  |
| Number of cardiovascular-related hospital days                  | 1.06 $\pm$ 1.50   | 1.19 $\pm$ 1.57   | 0.08  |

---

SD: standard deviation

**Supplementary Table 5.** Crude incidence rates and hazard ratios of amputation, revascularization, or hospitalization for medical treatment in propensity score-matched cohort of diabetic patients receiving peripheral artery bypass surgery and stenting

|                                                                                     | Incidence rate per 1,000 person-years (95% CI) |                        | Crude Hazard ratio<br>†<br>(95% CI) | P-value | Hazard ratio †<br>(95% CI) adjusted for<br>age, sex, and covariates<br>that were imbalanced ‡ | P-value |
|-------------------------------------------------------------------------------------|------------------------------------------------|------------------------|-------------------------------------|---------|-----------------------------------------------------------------------------------------------|---------|
|                                                                                     | Stenting *                                     | Bypass surgery *       |                                     |         |                                                                                               |         |
| Amputation                                                                          | 57.75 (57.23-58.26)                            | 94.46 (94.03-94.89)    | 0.65 (0.47-0.89)                    | 0.007   | 0.67 (0.48-0.92)                                                                              | 0.013   |
| Foot, ankle, leg                                                                    | 47.14 (46.68-47.60)                            | 72.11 (71.74-72.49)    | 0.70 (0.49-0.99)                    | 0.043   | 0.72 (0.50-1.03)                                                                              | 0.063   |
| Thigh                                                                               | 8.25 (8.06-8.44)                               | 19.30 (19.10-19.49)    | 0.45 (0.20-1.01)                    | 0.052   | 0.47 (0.21-1.06)                                                                              | 0.070   |
| Amputation,<br>revascularization,<br>or hospitalization<br>for medical<br>treatment | 63.64 (63.10-64.17)                            | 110.20 (109.74-110.67) | 0.61 (0.46-0.83)                    | 0.001   | 0.63 (0.46-0.85)                                                                              | 0.003   |

\* Stenting: total follow-up 848.55 person-years; Bypass surgery: total follow-up 1969.11 person-years

† Hazard ratio using bypass surgery as the reference

‡ Including sex, nephropathy, ischemic stroke, chronic renal failure, Charlson's index, number of different ICD-9 diagnoses, fast-acting insulin, aspirin, amputation at index hospitalization, number of hospitalization due to diabetes, and number of hospitalization not due to diabetes

**Supplementary Figure**

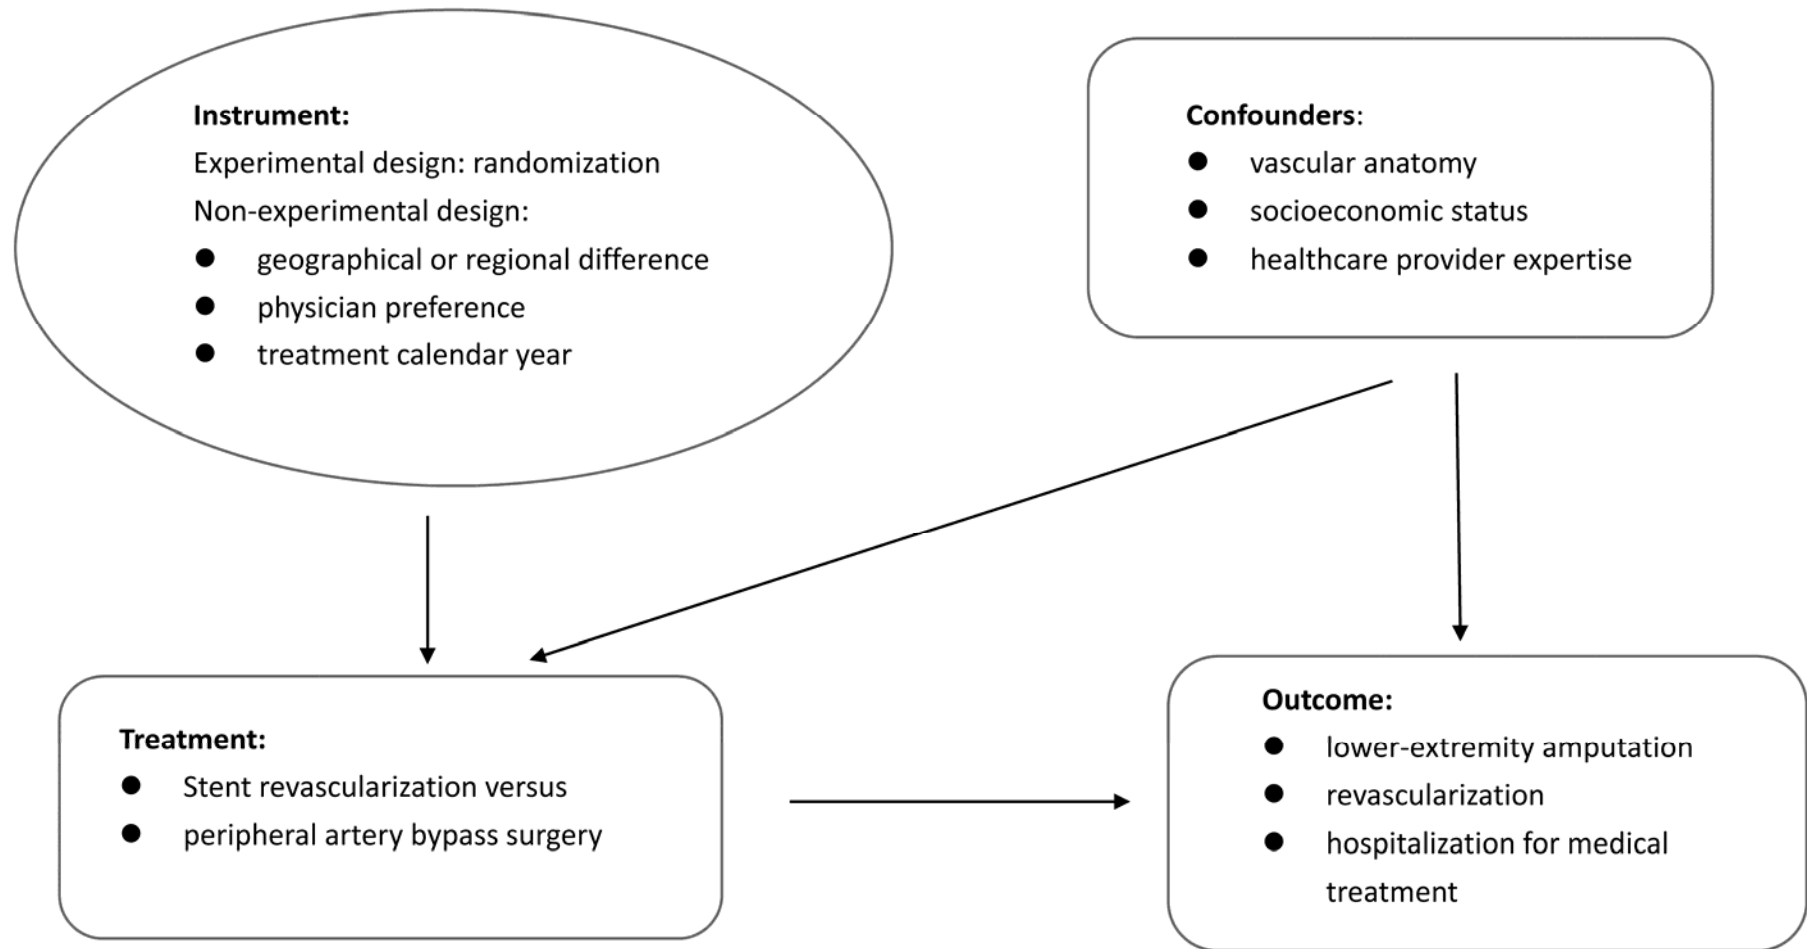

Supplement: srep37177-s1.pdf [file srep37177-s1.pdf]
